# Supplementary material for: Positive Impact of Intraoperative Epidural Ropivacaine Infusion on Oncologic Outcomes in Pancreatic Cancer Patients Undergoing Pancreatectomy: A Retrospective Cohort Study
Source: PubMed Central journal article supplement (PMC8210573; doi:10.7150/jca.57661), 2021-05-27
Supplement: jcav12p4513s1.pdf [file jcav12p4513s1.pdf]

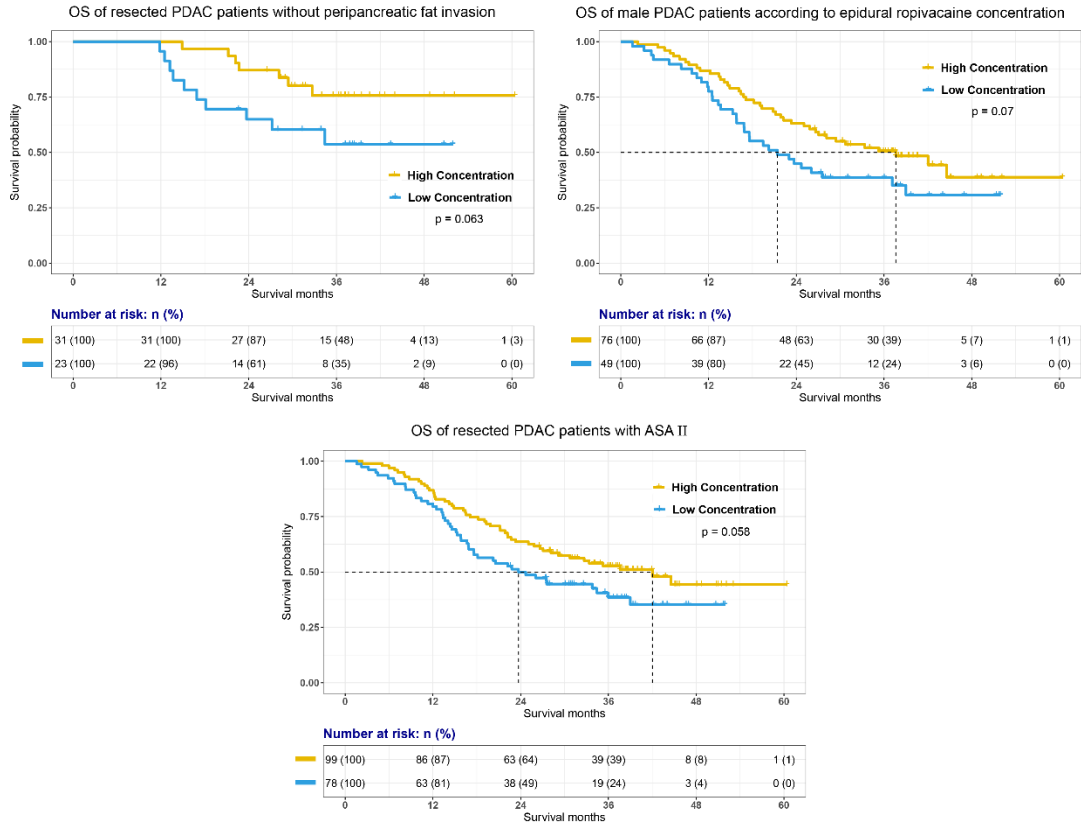

Figure S1. Survival analyses of specific subgroups according to the epidural ropivacaine concentration.
